# Supplementary material for: PI3Kα inactivation in leptin receptor cells increases leptin sensitivity but disrupts growth and reproduction
Source: JCI journal article supplement (doi:10.1172/jci.insight.96728), 2017-12-06
Supplement: sd1 [file 1]

## **SUPPLEMENTAL MATERIAL**

### **PI3K $\alpha$ inactivation in leptin receptor cells increases leptin sensitivity but disrupts growth and reproduction**

David Garcia-Galiano<sup>1</sup>, Beatriz C. Borges<sup>1,2</sup>, Jose Donato Jr<sup>3</sup>, Susan J. Allen<sup>1</sup>, Nicole Bellefontaine<sup>1</sup>, Mengjie Wang<sup>4</sup>, Jean J. Zhao<sup>5</sup>, Kenneth M. Kozloff<sup>6</sup>, Jennifer W. Hill<sup>4</sup>, Carol F. Elias<sup>1,7</sup> \*

<sup>1</sup>Department of Molecular and Integrative Physiology, University of Michigan, Ann Arbor, MI, USA;

<sup>2</sup>Department of Physiology, University of São Paulo, Ribeirão Preto, SP, Brazil;

<sup>3</sup>Department of Physiology and Biophysics, University of São Paulo, São Paulo, SP, Brazil;

<sup>4</sup>Department of Physiology and Pharmacology, University of Toledo, Toledo, OH, USA;

<sup>5</sup>Department of Biological Chemistry and Molecular Pharmacology, Harvard Medical School, Boston, MA, USA;

<sup>6</sup>Department of Biomedical Engineering, University of Michigan, Ann Arbor, MI, USA;

<sup>7</sup>Department of Obstetrics and Gynecology, University of Michigan, Ann Arbor, MI, USA.

**Supplementary Figures: 6**

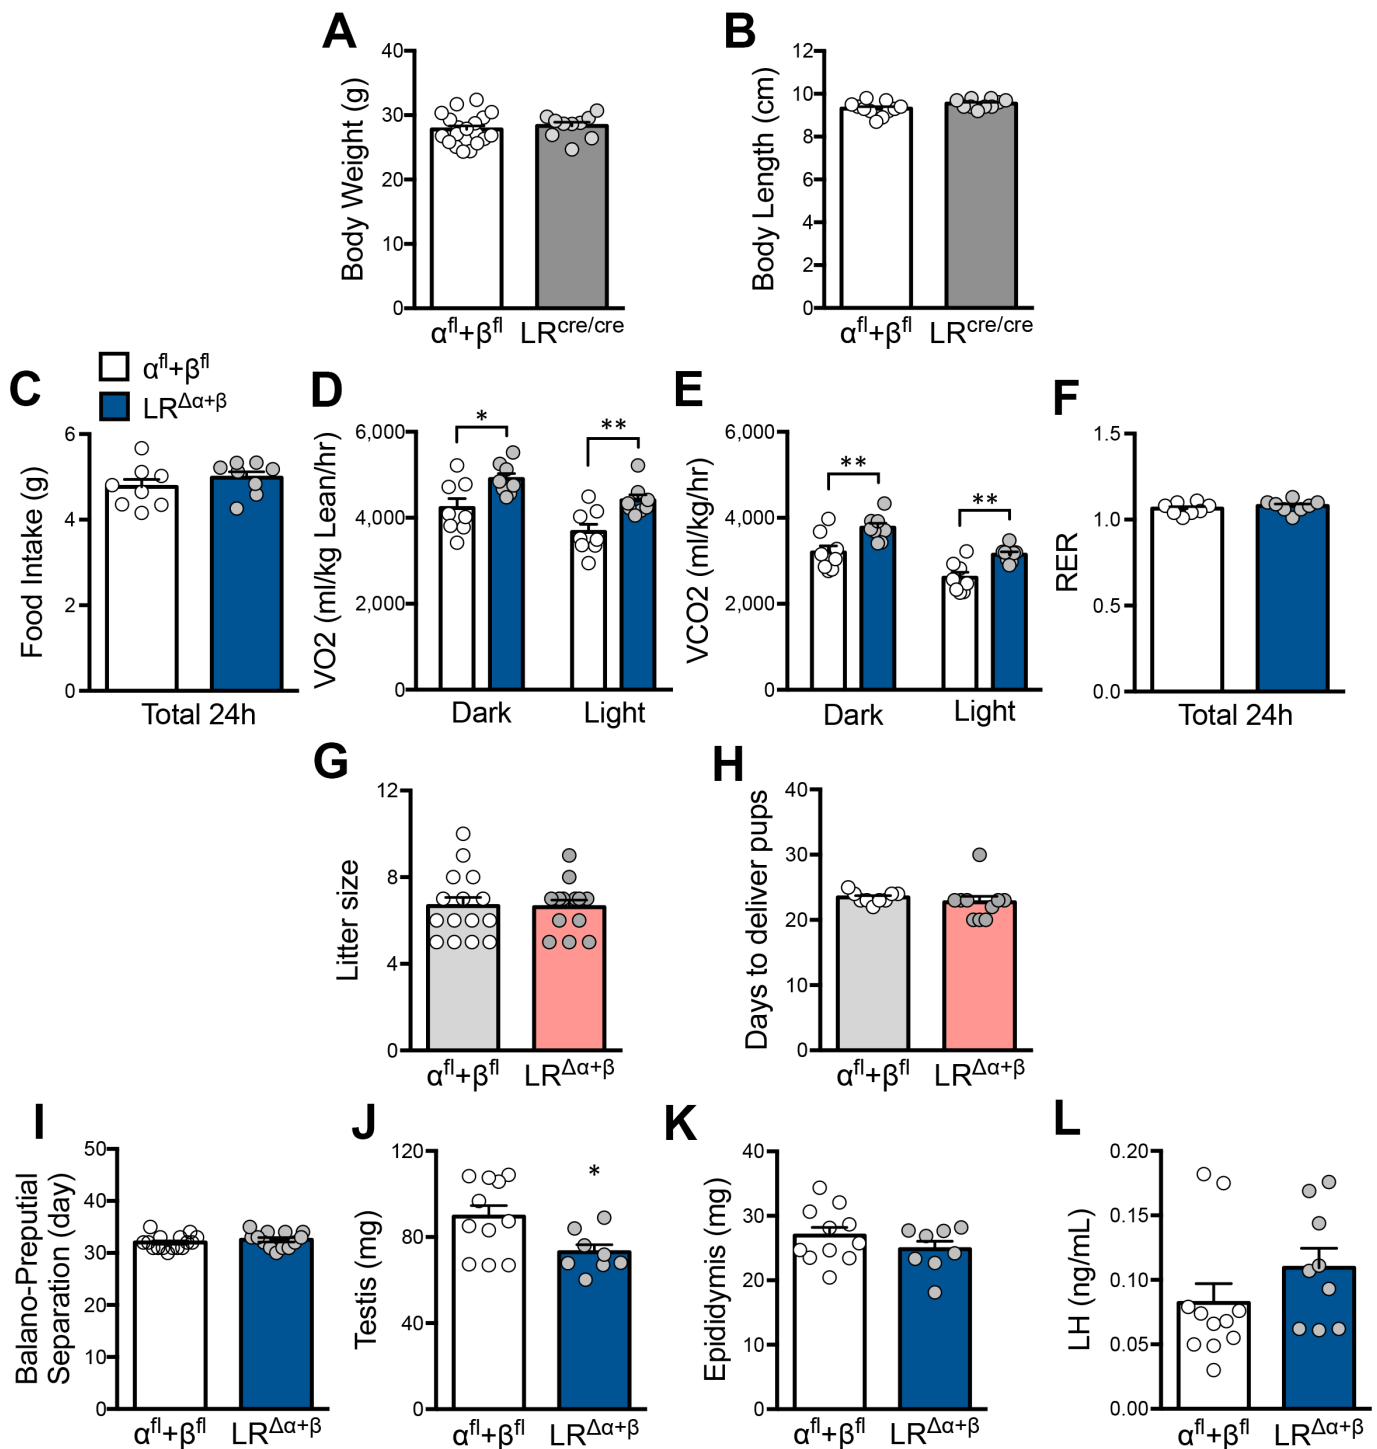

**Supplementary Figure 1. Metabolic and reproductive phenotypes of  $LR^{\Delta\alpha+\beta}$  and  $LR^{cre/cre}$  mice.** (A) Similar body weight of  $\alpha^{fl}+\beta^{fl}$  (n=19) and  $LR^{cre/cre}$  (n=10) males at 12 weeks of age, and (B) body length in adult  $\alpha^{fl}+\beta^{fl}$  (n=11) and  $LR^{cre/cre}$  (n=10) males. (C) Daily food intake in  $\alpha^{fl}+\beta^{fl}$  and  $LR^{\Delta\alpha+\beta}$  (n=8/group) males. (D) Increased  $O_2$  consumption ( $t_{14}=2.68$ ,  $p=0.018$  in dark phase;  $t_{14}=3.33$ ,  $p=0.005$  in light phase); and (E)  $CO_2$  production in dark and light phase in  $LR^{\Delta\alpha+\beta}$  compared to  $\alpha^{fl}+\beta^{fl}$  males (n=8/group;  $t_{14}=3.09$ ,  $p=0.008$  in dark phase;  $t_{14}=3.87$ ,  $p=0.0017$  in light phase), during CLAMS study. (F) No changes in respiratory exchange ratio (RER) average in 24 hours were detected between groups. (G) Litter size ( $\alpha^{fl}+\beta^{fl}$ , n=15; and  $LR^{\Delta\alpha+\beta}$ , n=13) and (H) days to deliver pups. (I) Similar day of pubertal completion in males by balano-preputial separation ( $\alpha^{fl}+\beta^{fl}$ , n=16; and  $LR^{\Delta\alpha+\beta}$ , n=13), but (J) reduced testis weight in  $LR^{\Delta\alpha+\beta}$  mice ( $t_{17}=2.44$ ,  $p=0.026$ ). No changes in (K) epididymis weight, (L) or serum LH levels in  $\alpha^{fl}+\beta^{fl}$  (n=11) and  $LR^{\Delta\alpha+\beta}$  (n=8) mice at 9 weeks of age. Each point represents one individual mouse, and all values are presented as mean  $\pm$  s.e.m. \* $p < 0.05$ , \*\* $p < 0.01$  vs control mice; by two-tailed Student's  $t$ -test.

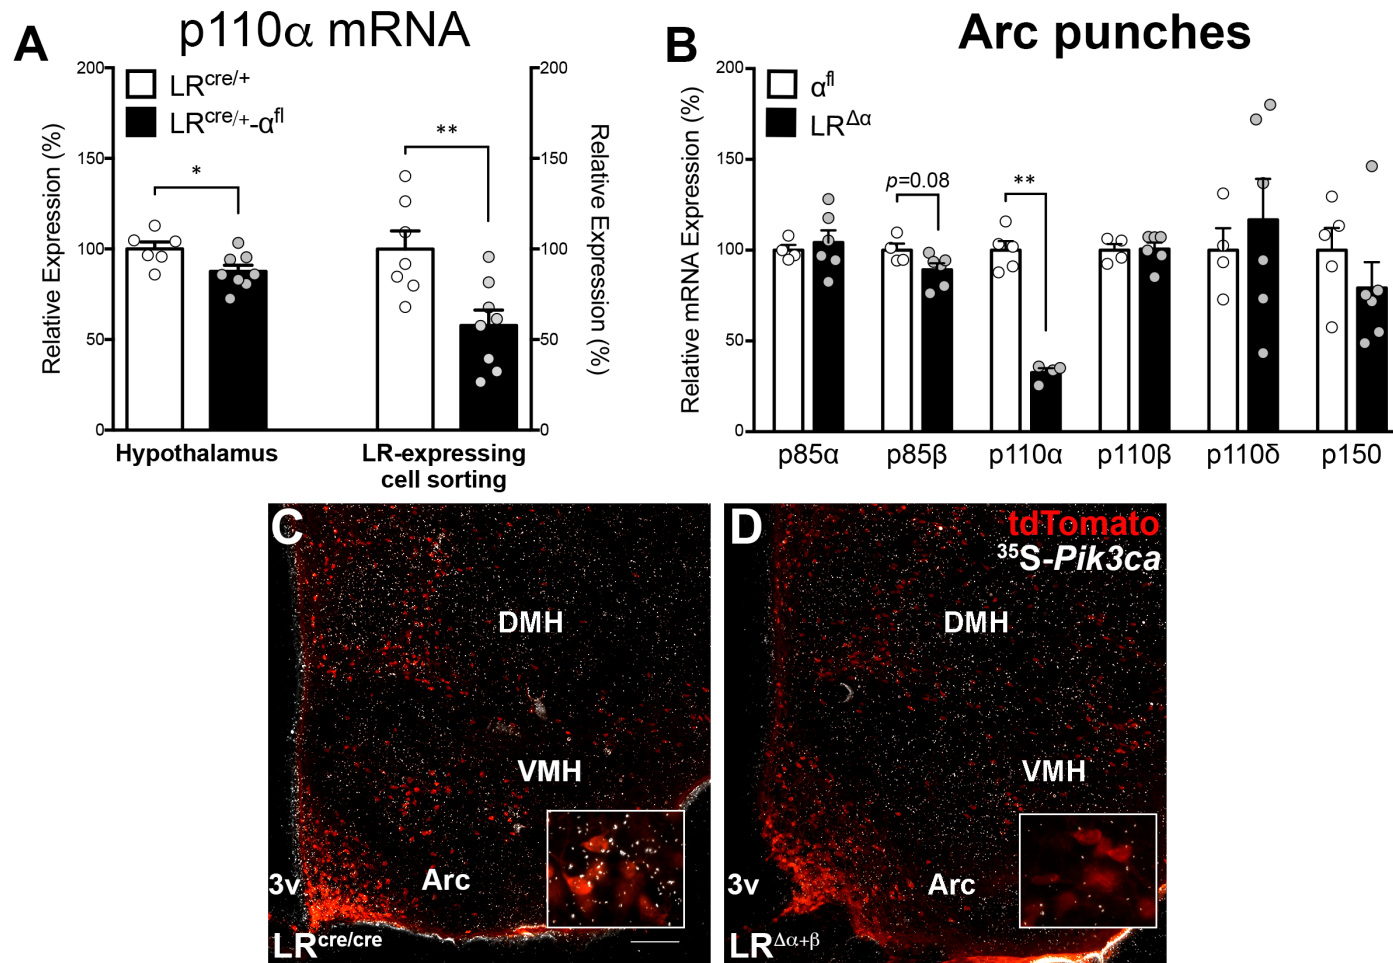

**Supplementary Figure 2. Validation of PI3K $\alpha$  mRNA deletion in LR cells.** (A) Significant reduction of Pik3ca mRNA (coding for p110 $\alpha$ /PI3K $\alpha$  subunit) expression in whole hypothalamus of LR<sup>cre/+</sup>- $\alpha^{fl}$  (n=8) respect to LR<sup>cre/+</sup> mice (n=6;  $t_{12}=2.41$ ,  $p=0.033$ ), and in neurons that putatively express the LR isolated from by fluorescence-activated cell sorting (FACS), using the tdTomato fluorescent protein (LR<sup>cre/+</sup>, n=7; LR<sup>cre/+</sup>- $\alpha^{fl}$ , n=8;  $t_{13}=3.25$ ,  $p=0.006$ ). Reduction of 12% and 42.2% in Pik3ca expression, respectively, were observed compared to controls. (B) Detection of mRNA expression levels of different PI3K catalytic and regulatory subunits in arcuate nucleus (Arc) punches of adult LR $\Delta\alpha$  (n=6) and  $\alpha^{fl}$  females (n=4-5;  $t_8=2.04$ ,  $p=0.08$  for p85 $\beta$ ) showed a 70% reduction of Pik3ca expression in Arc of LR $\Delta\alpha$  compared to  $\alpha^{fl}$  mice ( $t_7=11.22$ ,  $p<0.0001$ ). Representative images of Pik3ca mRNA (silver grains) distribution in the Arc, dorsomedial and ventromedial nucleus of the hypothalamus (DMH and VMH, respectively) over (C) LR<sup>cre/cre</sup> and (D) LR $\Delta\alpha+\beta$  tdTomato (n=3/group) positive cells. Dual-label ISH and IHC shows minimal hybridization signal over tdTomato cells in LR $\Delta\alpha+\beta$  mice. Each circle represents one individual mouse, and all values are showed as mean  $\pm$  s.e.m. Scale bar: 100  $\mu$ m. \* $p<0.05$ , \*\* $p<0.01$  vs control; by two-tailed Student's  $t$ -test.

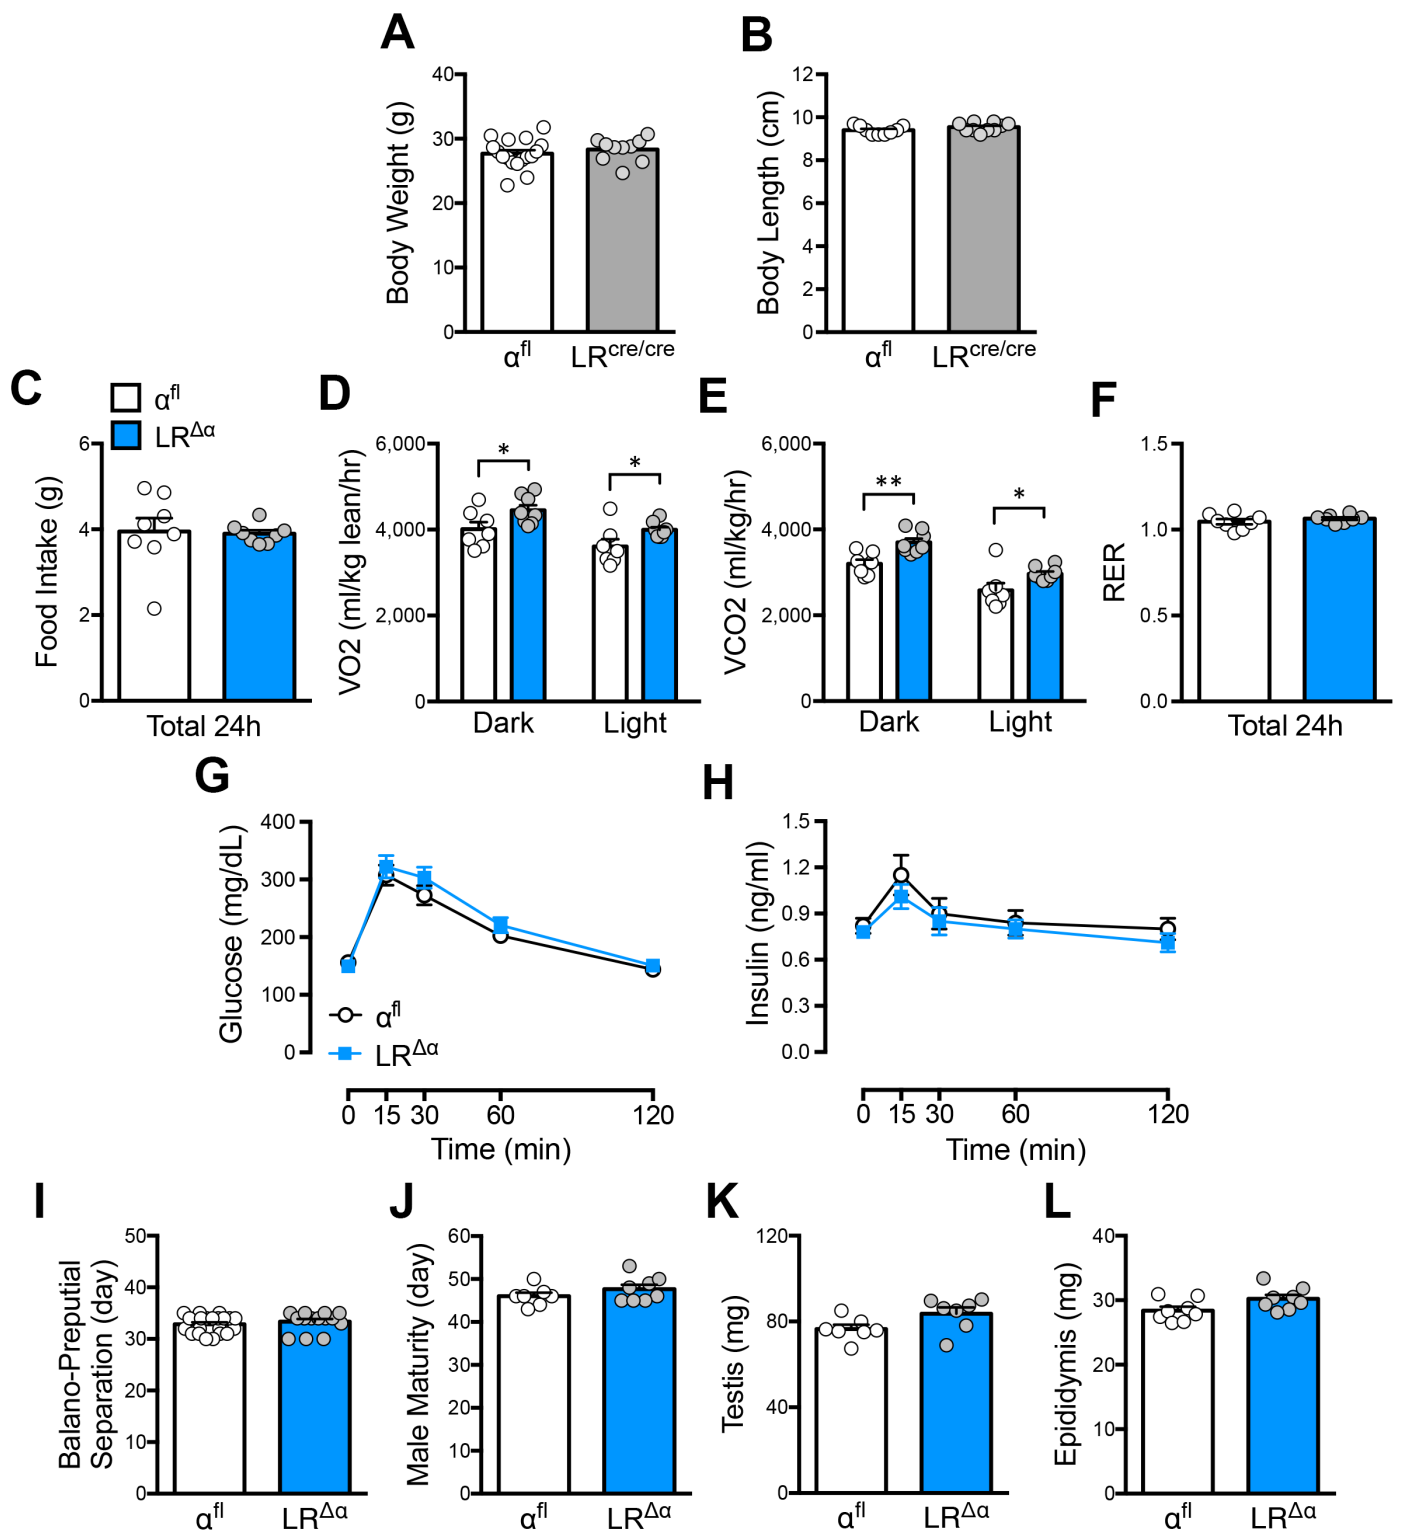

**Supplementary Figure 3. Metabolic and reproductive phenotypes of  $LR^{\Delta\alpha}$  mice.** (A) Similar body weight in young adult  $\alpha^{fl}$  (n=17) and  $LR^{cre/cre}$  (n=10) males, and (B) body length in  $\alpha^{fl}$  (n=9) and  $LR^{cre/cre}$  (n=10) males. (C) Total daily food intake in  $\alpha^{fl}$  and  $LR^{\Delta\alpha}$  males (n=8/group) during CLAMS study. Increased (D)  $O_2$  consumption ( $t_{13}=2.24$ ,  $p=0.04$  in dark and light phases), and (E)  $CO_2$  production in dark and light phases in  $LR^{\Delta\alpha}$  respect to control males (n=8/group;  $t_{13}=3.72$ ,  $p=0.0026$  in dark phase;  $t_{13}=2.3$ ,  $p=0.039$  in light phase). (F) No changes in respiratory exchange ratio (RER) between groups (n=8/group) were detected, or in (G) glucose and (H) insulin levels in glucose tolerance test at basal (0'), 15, 30, 60 and 120 after oral glucose administration in  $\alpha^{fl}$  (n=8) and  $LR^{\Delta\alpha}$  (n=6) males. (I) Day of balano-preputial separation in  $\alpha^{fl}$  (n=22) and  $LR^{\Delta\alpha}$  (n=14). (J) Day of male sexual maturation was calculated after mating pubertal (P32) males with experienced wild-type females and subtracting 21 days after first litter was born ( $\alpha^{fl}$ , n=7; and  $LR^{\Delta\alpha}$ , n=8). Similar (K) testis and (L) epididymis weight at 10 weeks of age (n=8/group). Each point represents one individual mouse, and all values are showed as mean  $\pm$  s.e.m. \* $p < 0.05$ , \*\* $p < 0.01$  vs control; by two-tailed Student's  $t$ -test.

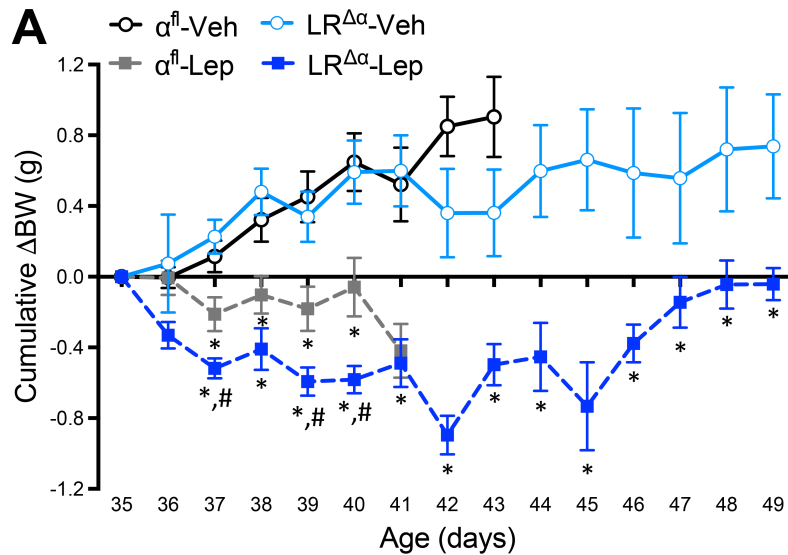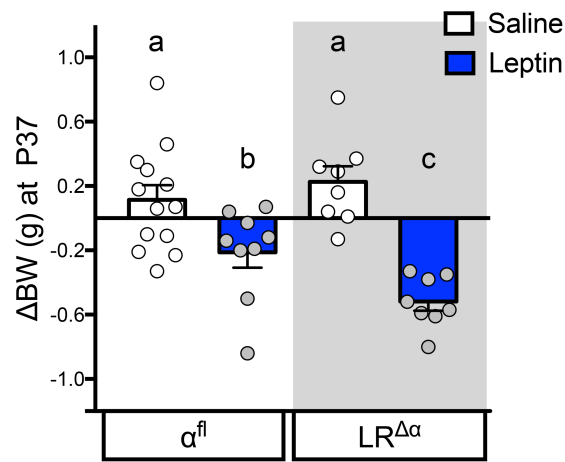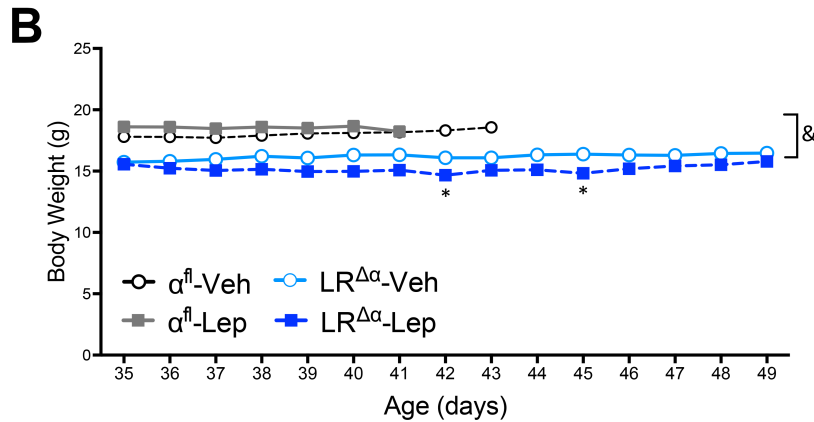

**Supplementary Figure 4. Effect on body weight progression after daily leptin supplementation to pubertal females.** (A) Cumulative body weight gain ( $\Delta BW$ ) in pubertal  $\alpha^{fl}$  females treated with ip vehicle ( $n=13$ ) or leptin ( $n=9$ ;  $2 \mu\text{g/g}$  of body weight), and  $LR^{\Delta\alpha}$  females treated with vehicle or leptin ( $n=8/\text{treatment}$ ;  $F(3,34)=11.68$ ,  $p<0.0001$  for genotype analysis;  $F(18,204)=6.57$ ,  $p<0.0001$  for interaction analysis). In  $LR^{\Delta\alpha}$  females, dose of leptin was reduced to  $1.8 \mu\text{g/g}$  of body weight when cumulative weight loss was higher than  $0.8 \text{ g}$  test. Note that  $\alpha^{fl}$  and  $LR^{\Delta\alpha}$  females at P37, after two days of vehicle or leptin treatment showed higher decrease in  $\Delta BW$  in  $LR^{\Delta\alpha}$  respect to  $\alpha^{fl}$  females ( $F(1,34)=33.95$ ,  $p<0.0001$  for treatment analysis;  $F(1,34)=5.37$ ,  $p=0.027$  for interaction analysis). (B). Body weight progression in pubertal  $\alpha^{fl}$  and  $LR^{\Delta\alpha}$  females treated with ip vehicle or leptin ( $F(1.5,9)=396$   $p<0.0001$  for interaction analysis). Each point represents one individual mouse, and all values are presented as mean  $\pm$  s.e.m. \*  $p<0.05$  vs vehicle (Veh) group; #  $p<0.05$  vs  $\alpha^{fl}$  + leptin (Lep) group; &  $p<0.001$  vs control group; groups with different superscript letters are statistically different; by two-way ANOVA with Holm-Sidak's *post hoc* analysis.

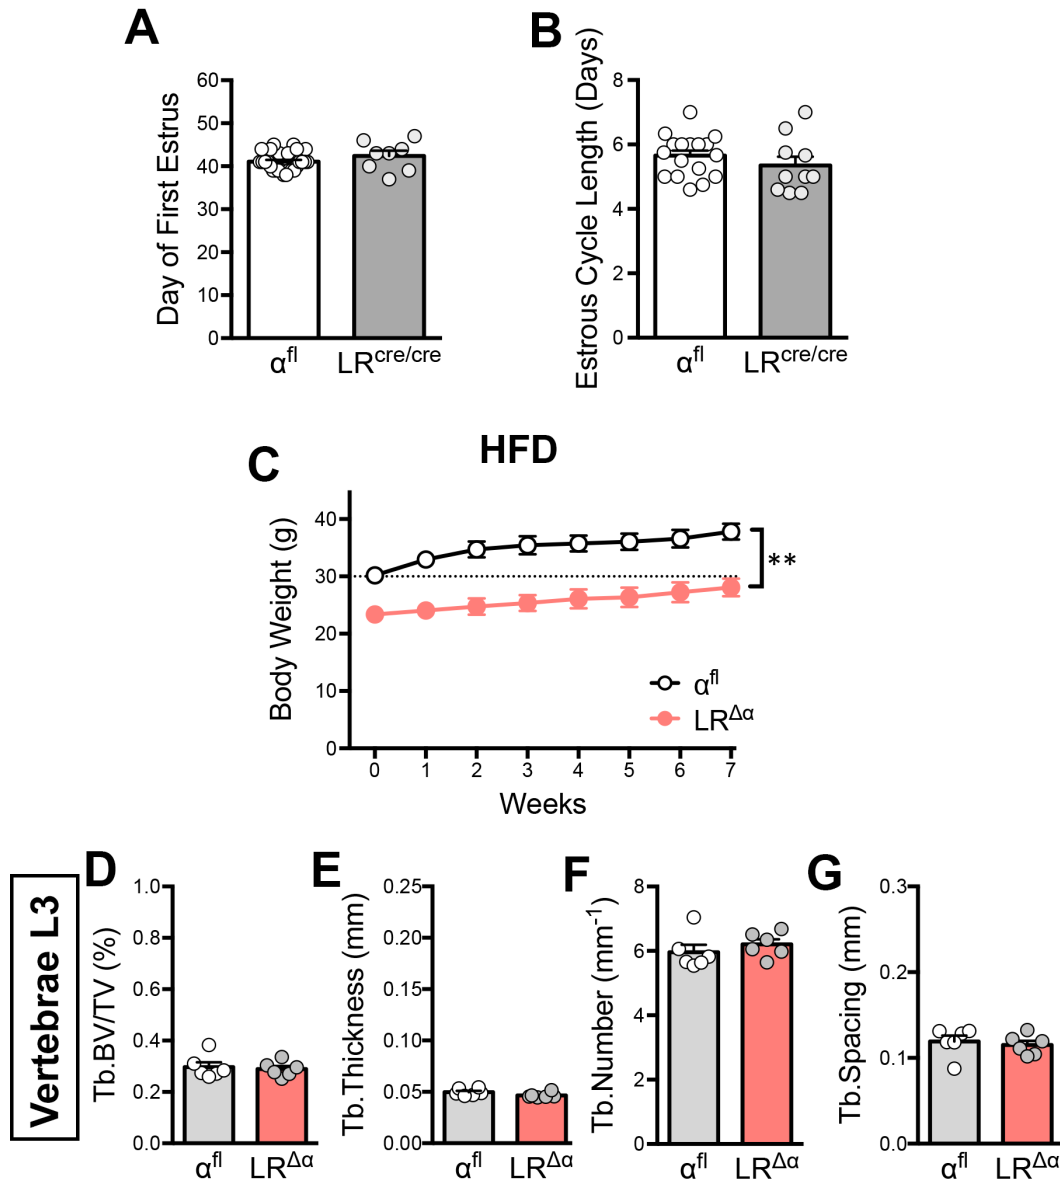

**Supplementary Figure 5. Metabolic, reproductive and bone phenotypes in mice with deletion of PI3K $\alpha$  in LR cells.** (A) Similar day of first estrus in  $\alpha^{fl}$  (n=27) and  $LR^{cre/cre}$  (n=8) mice, and (B) estrous cycle length in  $\alpha^{fl}$  (n=17) and  $LR^{cre/cre}$  (n=10) animals. (C) Reduced body weight progression in  $LR^{\Delta\alpha}$  (n=12) compared to  $\alpha^{fl}$  (n=9) mice for 7 weeks on HFD ( $F(1, 19)=26.9$ ,  $p<0.0001$ ). (D-G) MicroCT analysis of vertebrae in  $\alpha^{fl}$  and  $LR^{\Delta\alpha}$  (n=6/group) females did not detect changes between groups for (D) trabecular (Tb) bone volume respect to total volume (Tb.BV/TV), (E) trabecular thickness, (F) trabecular number, or (G) trabecular spacing. HFD: high fat diet; Tb: trabecular; Ct: cortical; BV: bone volume; TMD: tissue mineral density. Each point represents one individual mouse, and all values are presented as mean  $\pm$  s.e.m. \*\* $p<0.01$  vs control mice; by repeated measures two-way ANOVA with Holm-Sidak's *post hoc* analysis in c; and two-tailed Student's *t*-test in A, B, and D-G.

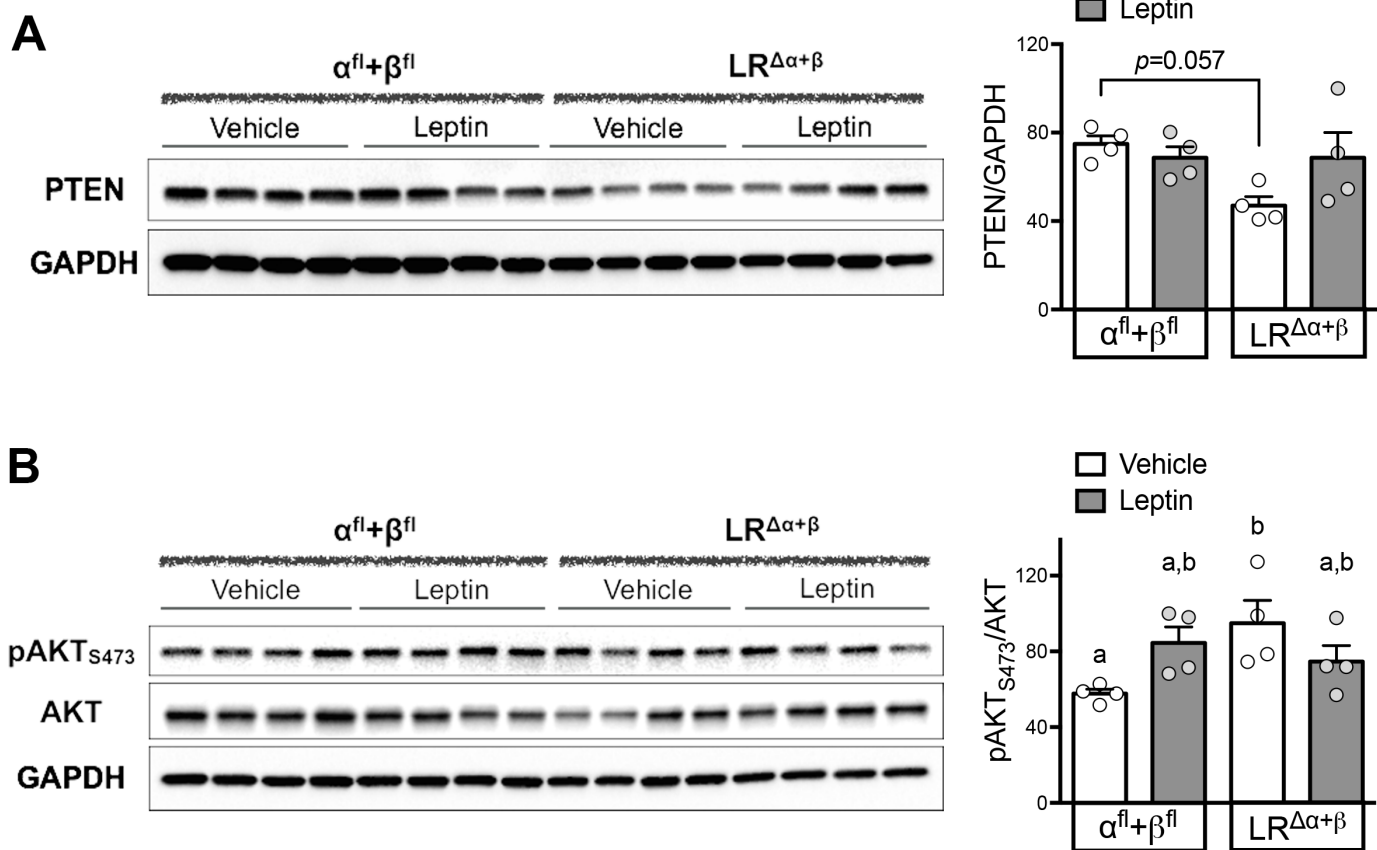

**Supplementary Figure 6. Altered hypothalamic PTEN and pAKT<sub>S473</sub> levels in LR<sup>Δα+β</sup> mice.**

Representative western-blotting and relative protein quantification of (A) PTEN in LR<sup>Δα+β</sup> respect to control  $\alpha^{fl}+\beta^{fl}$  mice ( $F(1,12)=4.18$ ,  $p=0.057$ ); (B) pAKT at Ser473 (pAKT<sub>S473</sub>) residue from hypothalamic extracts of diestrous fasted mice injected with vehicle or leptin showed increased pAKT<sub>S473</sub> levels in LR<sup>Δα+β</sup> compared to  $\alpha^{fl}+\beta^{fl}$  females ( $n=4/\text{treatment}$ ;  $F(1,12)=7.468$ ,  $p=0.018$ ). Each point represents one individual mouse, and all values are presented as mean  $\pm$  s.e.m. Groups with different superscript letters are statistically different; by two-way ANOVA with Tukey's *post hoc* analysis.

**Table 1** – List of primers used for genotyping

| <b>Mice</b>           | <b>Forward primers</b>                                                           |
|-----------------------|----------------------------------------------------------------------------------|
| InsR-floxed           | F 5' CTGAATAGCTGAGACCACAG 3'<br>R 5' GATGTGCACCCCATGTCT 3'                       |
| LR-Cre                | F 5' TGCTTCTGTCCGTTTGCCGGT 3'<br>R 5' GTGAAACAGCATTGCTGTCAC 3'                   |
| p110 $\alpha$ -floxed | F 5' CTGTGTAGCCTAGTTTAGAGCAACCATCTA 3'<br>R 5' CCTCTCTGAACAGTTCATGTTTGATGGTGA 3' |
| p110 $\beta$ -floxed  | F 5' CTCAAACTAGTGACTAGAAAGCTGTGA 3'<br>R 5' CTGATCGAGGCCATTAGAGAAGACCG 3'        |
| R26-tdTomato          | F 5' CTGTTCTGTACGGCATGG 3'<br>R 5' GGCATTAAGCAGCGTATCC 3'                        |



**Table 2** – List of primers used for qPCR

| Target Genes                   | Reference Sequence | Primers                                                              |
|--------------------------------|--------------------|----------------------------------------------------------------------|
| <i>Agrp</i>                    | NM_001271806       | F 5' AAGCTCAGGGCACAAGAGAC 3'<br>R 5' CAGTGCCAACAGCAGAACAC 3'         |
| <i>Fgf21</i>                   | NM_                | F 5' CTCTATGGATCGCCTCAC 3'<br>R 5' GTACACATTGTAACCGTCC 3'            |
| <i>Gapdh</i>                   | NM_001289726       | F 5' GCTCATGACCACAGTCCATGC 3'<br>R 5' GTTGGGGGGGGATAGGGCCTCTCTTG 3'  |
| <i>Gh</i>                      | NM_008117          | F 5' CCTCAGCAGGATTTTCACCA 3'<br>R 5' CTTGAGGATCTGCCAACAC 3'          |
| <i>Ghr</i>                     | NM_001048178       | F 5' GATTTTACCCCAGTCCCAGTTC 3'<br>R 5' GACCCTTCAGTCTTCTCATCCACA 3'   |
| <i>Ghrh</i>                    | NM_001329683       | F 5' CAACTGTACCCTGTTACTTC 3'<br>R 5' TTTTTCGAGATGAGAATGGG 3'         |
| <i>Igf1</i>                    | NM_001111274       | F 5' GACAAACAAGAAAACGAAGC 3'<br>R 5' ATTTGGTAGGTGTTTTTCGATG 3'       |
| <i>Insr</i>                    | NM_010568          | F 5' CAAACAGATGCCACTAATCC 3'<br>R 5' CTTTGAGACAATAATCCAGCTC 3'       |
| <i>Lepr</i>                    | NM_001122899       | F 5' CCTCTTGTGTCCTACTGCTCG 3'<br>R 5' GAAATTCAGTCCTTGTGCCAG 3'       |
| <i>Npy</i>                     | NM_023456          | F 5' CAGAAAACGCCCCCAGAACAAGC 3'<br>R 5' GGCAGACTGGTTTCAGGGGATGGAT 3' |
| <i>Pik3ca</i> (p110 $\alpha$ ) | NM_008839          | F 5' GAACCAGTAGGCAACCGTGA 3'<br>R 5' GCTCTGCTATGAGGCGAGTT 3'         |
| <i>Pik3cb</i> (p110 $\beta$ )  | NM_029094          | F 5' TTCTGCCACCCGGGATTTAT 3'<br>R 5' GCTCTGCTATGAGGCGAGTT 3'         |
| <i>Pik3cd</i> (p110 $\delta$ ) | NM_001029837       | F 5' GAACAAGGCAGACATCTAAG 3'<br>R 5' AGTCTTCGTGTTTCGTCTTCCA 3'       |
| <i>Pik3r1</i> (p85 $\alpha$ )  | NM_001024955       | F 5' ACATCTCAAGGGAAGAAGTG 3'<br>R 5' GGATCAGAGAAGCCATATTTTC 3'       |
| <i>Pik3r2</i> (p85 $\beta$ )   | NM_008841          | F 5' TTGGAGGATCTTCTGAGTC 3'<br>R 5' CTTACTGTAGCATTCACTGTGTC 3'       |
| <i>Pik3r4</i> (p150)           | NM_001081309       | F 5' AGCCAGTGATACAGATTGAG 3'<br>R 5' GCATAGTCAAATATGGAGCG 3'         |
| <i>Pomc</i>                    | NM_001278581       | F 5' TGAAAACCCCCGGAAGTACG 3'<br>R 5' ACGTTGGGGTACACCTTCAC 3'         |
| <i>Socs3</i>                   | NM_007707          | F 5' CCAAAGAAATAACCATCCC 3'<br>R 5' GATCTGCGAGGTTTCATTAG 3'          |
| <i>Sst</i>                     | NM_009215          | F 5' TCTGCATCGTCCTGGCTTT 3'<br>R 5' CTTGGCCAGTTCCTGTTTCC 3'          |
| <i>Ucp1</i>                    | NM_009463          | F 5' CTTTTTCAAAGGGTTTGTGG 3'<br>R 5' CTTATGTGGTACAATCCACTG 3'        |
